# Supplementary material for: Timosaponin Aiii Disrupts Morphological Plasticity and Migration of Breast Adenocarcinoma Through Inhibition of Integrin Internalisation
Source: Research Square preprint supplement (doi:10.21203/rs.3.rs-276535/v1), 2021-03-15
Supplement: Supplementary file 1 [file 55fe376b08758f7876e5a4ff.ai]

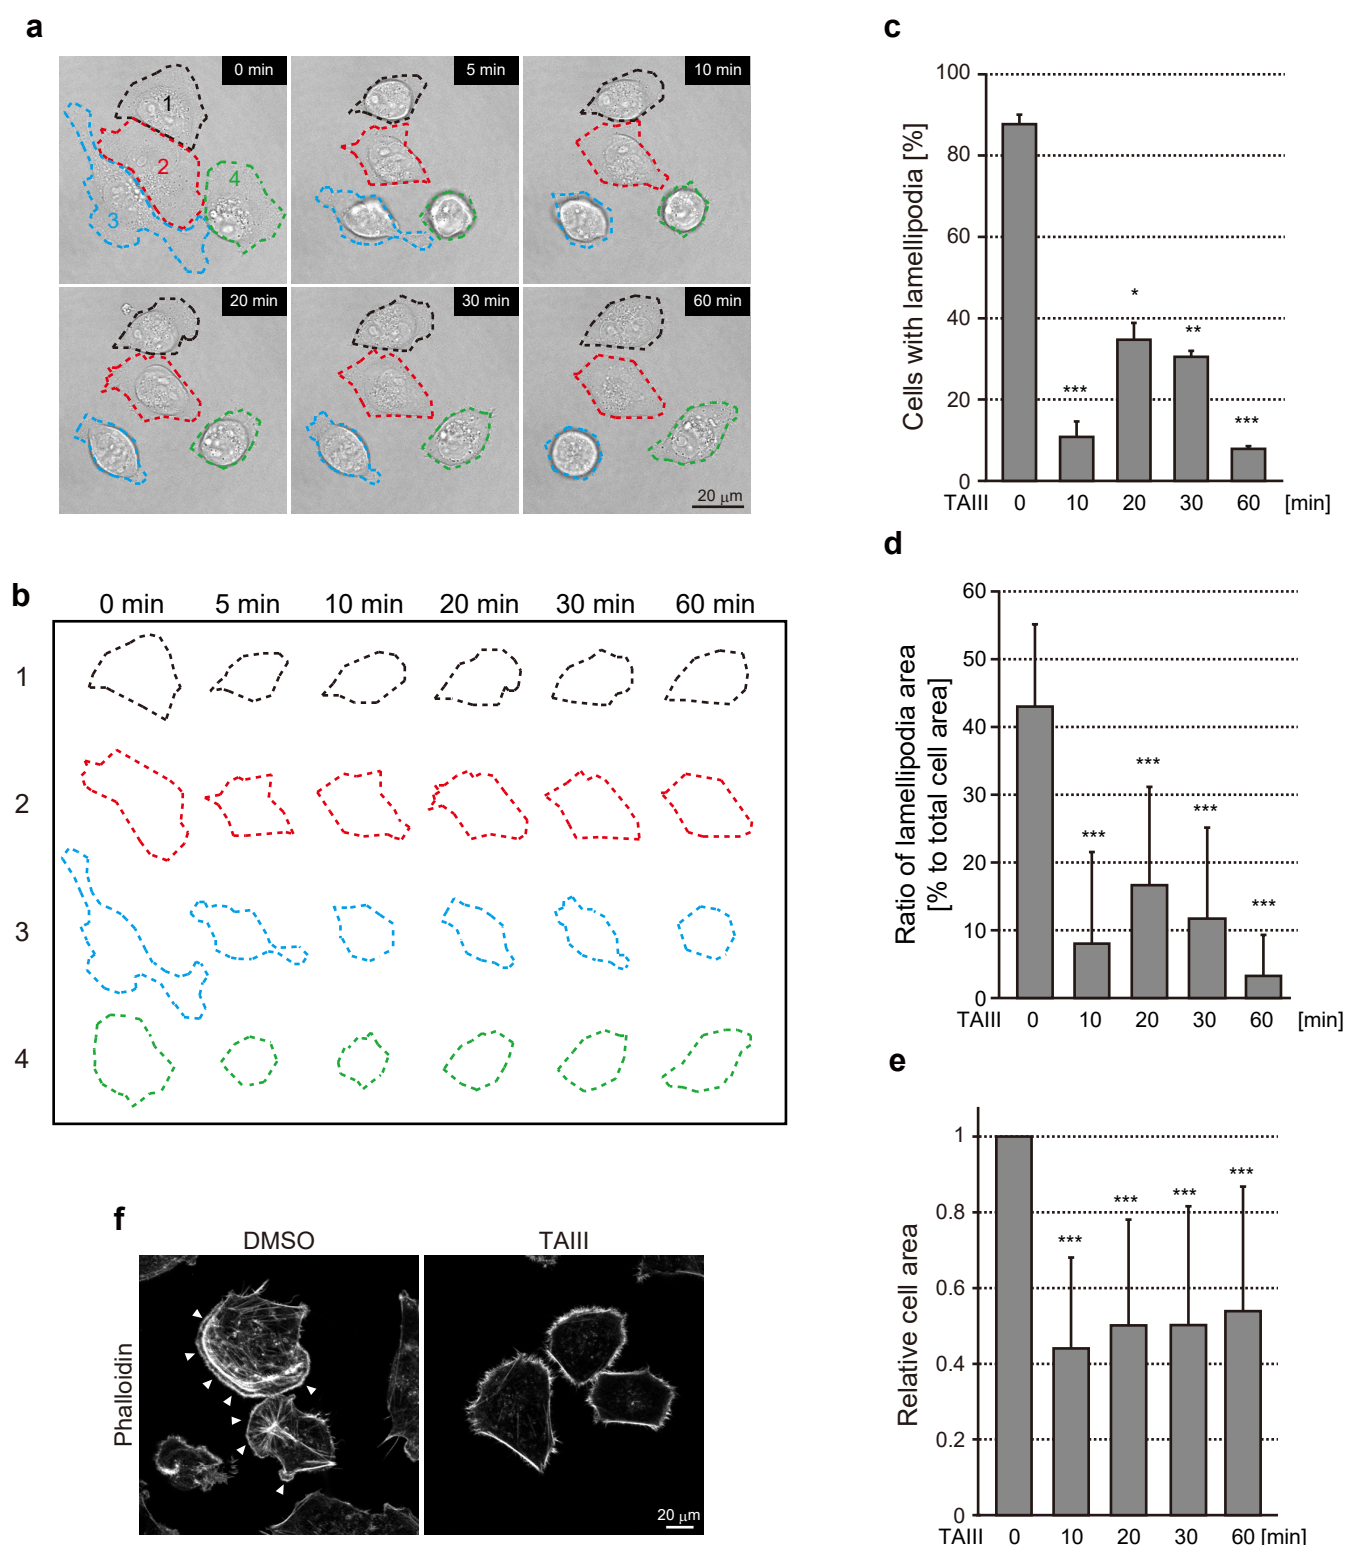

### Supplementary Figure S1 TAIII attenuated lamellipodia formation.

a. MDA-MB-231 cells treated with 10  $\mu\text{M}$  TAIII were subjected to time-lapse imaging analysis. Dashed line tracing in each color highlights outer edge of the individual cells. Bar; 20  $\mu\text{m}$ . b. Outlines of dynamic cell shape changes of the individual cells in (a). c. The ratio of cells with lamellipodia after TAIII treatment in (a). Each column shows the mean  $\pm$  s.e.m. of three independent experiments. \* $p < 0.05$ , \*\* $p < 0.001$  and \*\*\* $p < 0.005$  compared with cells at 0 min after TAIII treatment. d. The ratio of lamellipodia area in each individual cell after TAIII treatment in (b) ( $n = 40$ ). Each column shows the mean  $\pm$  s.d. \*\*\* $p < 0.005$  compared with cells at 0 min after TAIII treatment. e. Relative cell area in each individual cell after TAIII treatment in (b) ( $n = 40$ ). Each column shows the mean  $\pm$  s.d. \*\*\* $p < 0.005$  compared with the cell area at 0 min after TAIII treatment. f. MDA-MB-231 cells treated with 10  $\mu\text{M}$  TAIII for 1 h were fixed and stained with phalloidin. Bar; 20  $\mu\text{m}$ .
